# Supplementary material for: Climate extremes limiting the growth of East Asian mangroves for future nature-based solutions
Source: Copernicus journal article supplement (doi:10.5194/egusphere-2025-5805), 2025-12-05
Supplement: Supplementary file 1 [file egusphere-2025-5805-supplement.pdf]

Table S1. List of the CMIP6 ESMs used in this research

| Model            | Modelling Center (or Group)                                             |
|------------------|-------------------------------------------------------------------------|
| ACCESS-CM2       | Commonwealth Scientific and Industrial Research Organization, Australia |
| ACCESS-ESM1-5    | Commonwealth Scientific and Industrial Research Organization, Australia |
| AWI-CM-1-1-MR    | Alfred Wegener Institute, Germany                                       |
| BCC-CSM2-MR      | Beijing Climate Center, China                                           |
| CAMS-CSM1-0      | China Meteorological Administration, China                              |
| CAS-ESM2-0       | Chinese Academy of Sciences, China                                      |
| CESM2-WACCM      | National Centre for Atmospheric Research, USA                           |
| CMCC-CM2-SR5     | Fondazione Centro Euro-Mediterraneo sui Cambiamenti Climatici, Italy    |
| CMCC-ESM2        | Fondazione Centro Euro-Mediterraneo sui Cambiamenti Climatici, Italy    |
| CanESM5          | Canadian Centre for Climate Modelling and Analysis, Canada              |
| EC-Earth3        | EC-Earth Consortium, Europe                                             |
| EC-Earth3-Veg    | EC-Earth Consortium, Europe                                             |
| EC-Earth3-Veg-LR | EC-Earth Consortium, Europe                                             |
| FGOALS-f3-L      | Chinese Academy of Sciences, China                                      |
| FGOALS-g3        | Chinese Academy of Sciences, China                                      |
| GFDL-ESM4        | NOAA Geophysical Fluid Dynamics Laboratory, USA                         |
| IITM-ESM         | Indian Institute of Tropical Meteorology, India                         |
| INM-CM4-8        | Russian Academy of Science, Russia                                      |
| INM-CM5-0        | Russian Academy of Science, Russia                                      |
| IPSL-CM6A-LR     | Institute Pierre Simon Laplace, France                                  |
| KACE-1-0-G       | Korea Meteorological Administration, Korea                              |
| MIROC6           | Japan Agency for Marine-Earth Science and Technology, Japan             |
| MPI-ESM1-2-HR    | Max Planck Institute for Meteorology, Germany                           |
| MPI-ESM1-2-LR    | Max Planck Institute for Meteorology, Germany                           |
| MRI-ESM2-0       | Meteorological Research Institute, Japan                                |
| NorESM2-LM       | Norwegian Research Centre, Norway                                       |
| NorESM2-MM       | Norwegian Research Centre, Norway                                       |
| TaiESM1          | Research Center for Environmental Changes, Taiwan, China                |

Table S2. Mangrove species combinations in the three zones

| Zone          | Species combination                                                                                                                                                                                                                                                                                               |
|---------------|-------------------------------------------------------------------------------------------------------------------------------------------------------------------------------------------------------------------------------------------------------------------------------------------------------------------|
| Northern zone | <i>Kandelia obovata</i> , <i>Aegiceras corniculatum</i> , <i>Avicennia marina</i> , <i>Sonneratia apetala</i> , <i>Laguncularia racemosa</i>                                                                                                                                                                      |
| Middle zone   | <i>Bruguiera gymnoihoa</i> , <i>Sonneratia caseolaris</i> , <i>Rhizophora stylosa</i> , <i>K. obovata</i> , <i>A. corniculatum</i> , <i>A. marina</i> , <i>S. apetala</i> , <i>L. racemosa</i>                                                                                                                    |
| Southern zone | <i>Bruguiera sexangula</i> , <i>Rhizophora apiculata</i> , <i>Lumnitzera racemosa</i> , <i>Sonneratia alba</i> , <i>Ceriops tagal</i> , <i>B. gymnoihoa</i> , <i>S. caseolaris</i> , <i>R. stylosa</i> , <i>K. obovata</i> , <i>A. corniculatum</i> , <i>A. marina</i> , <i>S. apetala</i> , <i>L. a racemosa</i> |

\*Data from Zhao, C., Jia, M., Zhang, R., Wang, Z., Ren, C., Mao, D., and Wang, Y.: Mangrove species mapping in coastal China using synthesized Sentinel-2 high-separability images, Remote Sensing of Environment, 307, 114151, <https://doi.org/10.1016/j.rse.2024.114151>, 2024.

Table S3. Comparison of time-lagged effects of climatic factors between mangroves and forests

| Zone             |     | Northern |   |   |   | Middle |   |   |   | Southern |     |   |   |
|------------------|-----|----------|---|---|---|--------|---|---|---|----------|-----|---|---|
| Lag (months)     |     | 0        | 1 | 2 | 3 | 0      | 1 | 2 | 3 | 0        | 1   | 2 | 3 |
| Mean temperature | DJF | F        | F |   |   |        |   |   |   |          |     |   |   |
|                  | MAM |          | M | M |   |        |   |   | M |          | M   | M | M |
|                  | JJA | F        |   |   |   |        |   |   |   |          |     |   |   |
|                  | SON | M        | M |   |   |        |   |   |   |          |     |   |   |
| Solar radiation  | DJF |          |   |   |   |        |   |   |   | M        |     |   |   |
|                  | MAM | F        |   |   |   |        | F |   |   |          | M   |   |   |
|                  | JJA | F        |   | M | M | M      |   |   |   |          |     |   |   |
|                  | SON |          |   |   |   |        |   |   |   | F        | M/F |   |   |

\*This result is based on the time-lagged effect test for both mean temperature and solar radiation on mangroves and forests. The filled-in means the time-lagged effect is significant, with the letter and background color indicating the vegetation type: F with green background stands for forests, M with red background stands for mangroves, M/F with blue background stands for both mangroves and forests.

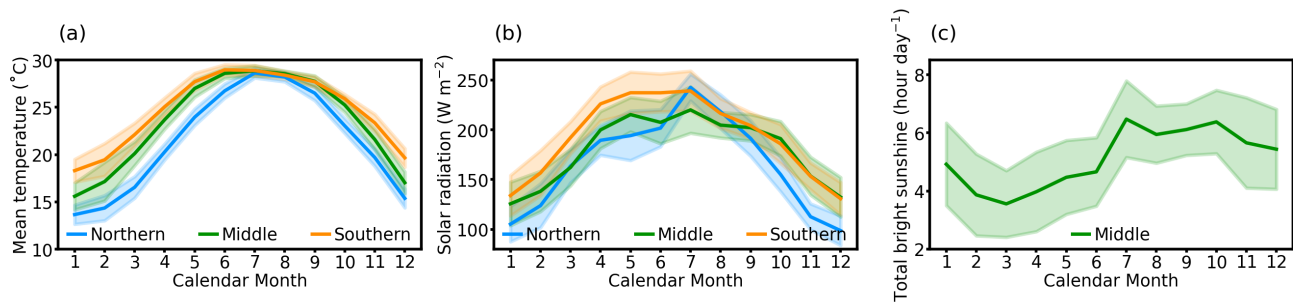

**Figure S1. Seasonal trend of climatic factors from 2001 to 2022.** The three climatic factors are mean temperature (a), solar radiation (b) and total bright sunshine (c). The data of the former two climatic factors were obtained from ERA5 data, while the total bright sunshine was accessed from Hong Kong Observatory which located in the middle zone.

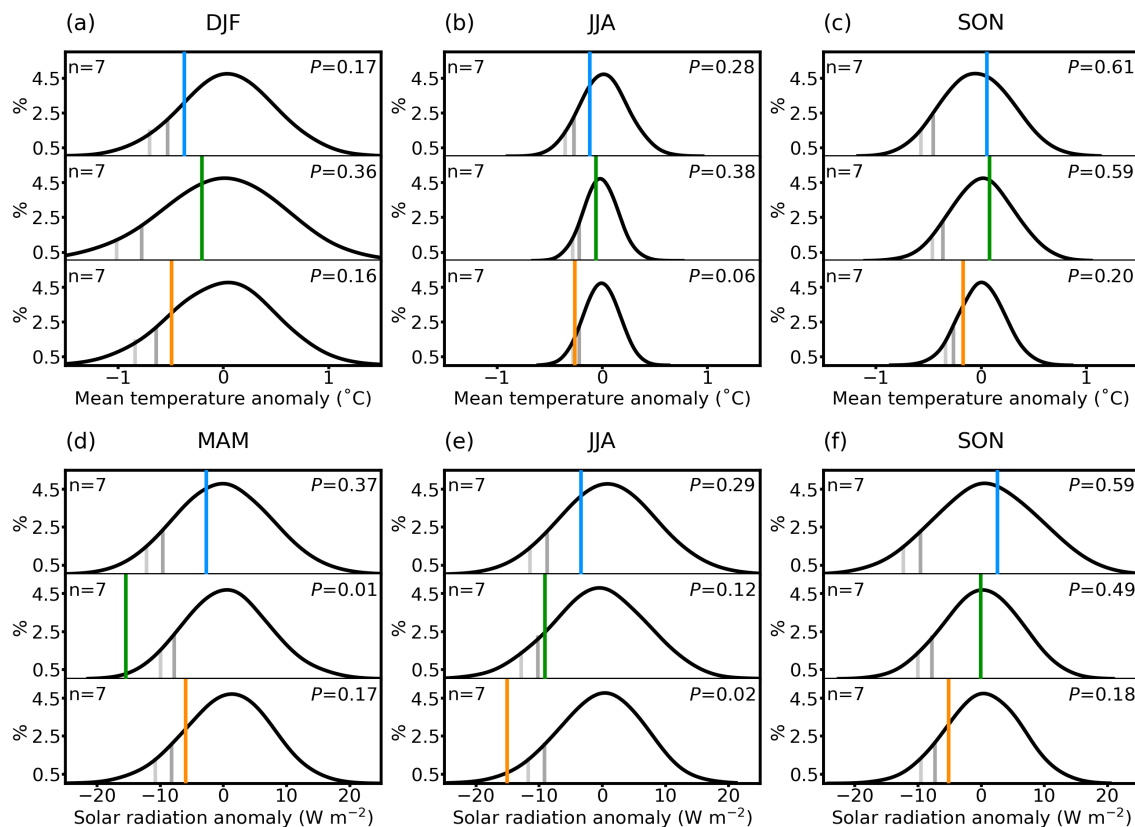

**Figure S2. Simultaneous impact of mean temperature and solar radiation on mangrove growth.** Bootstrap distribution for mean temperature and the significance test for extreme low cases are shown for DJF (a), JJA (b), SON (c), while (d), (e) and (f) are for solar radiation. Light gray lines represent  $P=0.05$ , and dark gray lines represent  $P=0.1$ . In the top left corner,  $n$  represents the number of cases selected. In the top right corner,  $P$  indicates the  $P$ -value result for the cases. Different colors indicate different zones: blue for northern zone, green for middle zone and orange for southern zone.

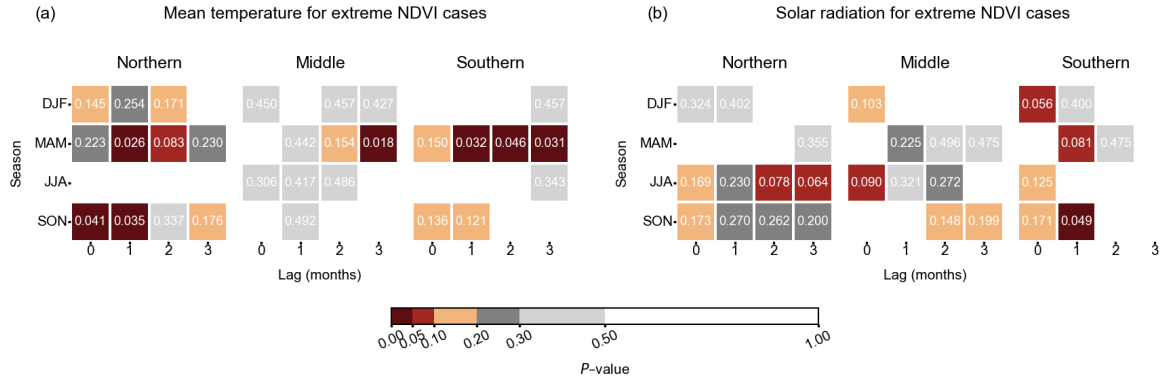

**Figure S3. Time-lagged effect of mean temperature and solar radiation on mangrove growth at seasonal composite.** Significance test for extreme NDVI cases to mean temperature (a), solar radiation (b). Each lag represents a 1-month period. Statistical significance here ( $P < 0.05$ ) indicates that mean temperature/solar radiation demonstrates a strong lagged correlation with the NDVI extremes with certain months of time lags.

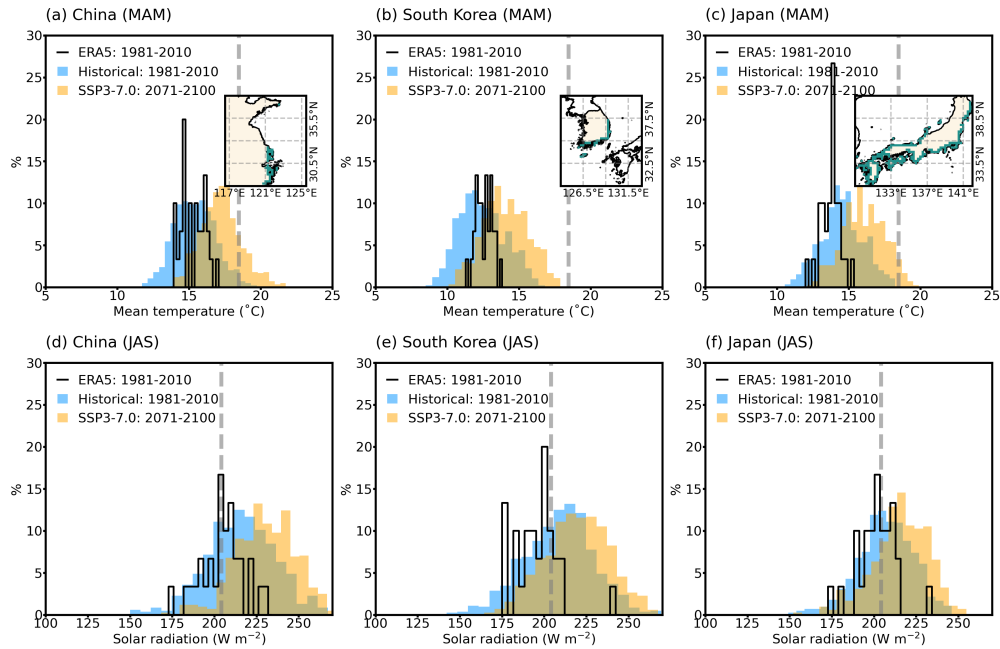

**Figure S4. Changes in temperature and solar radiation in future potential mangrove habitats.** Histogram of mean temperature comparing ERA5 (1981–2010), CMIP historical (1981–2010) and SSP1-2.6 (2071–2100) for future potential mangrove habitats in China (a), South Korea (b) and Japan (c). Same but for solar radiation in China (d), South Korea (e) and Japan (f). The grey dashed lines represent the threshold criteria for high mean temperature (top row) and low solar radiation (bottom row), using the northern zone as the reference standard. The maps delineate potential mangrove habitats under SSP1-2.6 by integrating: (1) current non-mangrove shorelines, and (2) projected expansion zones where winter (DJF) mean temperatures reach  $\geq 10^{\circ}\text{C}$  in SSP1-2.6 (2071–2100).
